# Supplementary material for: Biomimetic anisotropic poly(vinyl alcohol) hydrogels with significantly enhanced mechanical properties by freezing–thawing under drawing
Source: Royal Society of Chemistry journal article supplement (doi:10.1039/c9tb00372j), 2019-01-01
Supplement: c9tb00372j2.pdf [file c9tb00372j2.pdf]

## **Supporting Information**

### **Biomimetic Anisotropic Poly(vinyl alcohol) Hydrogels with Significantly Enhanced Mechanical Properties by Freezing-thawing under Drawing**

*Beijing Key Laboratory of Energy Conversion and Storage Materials, College of Chemistry, Beijing Normal University, Beijing 100875, P. R. China.*

Yuanyuan Chen, Chen Jiao, Xin Peng, Tianqi Liu, Yunqi Shi, Min Liang and Huiliang Wang\*

Supporting Figure

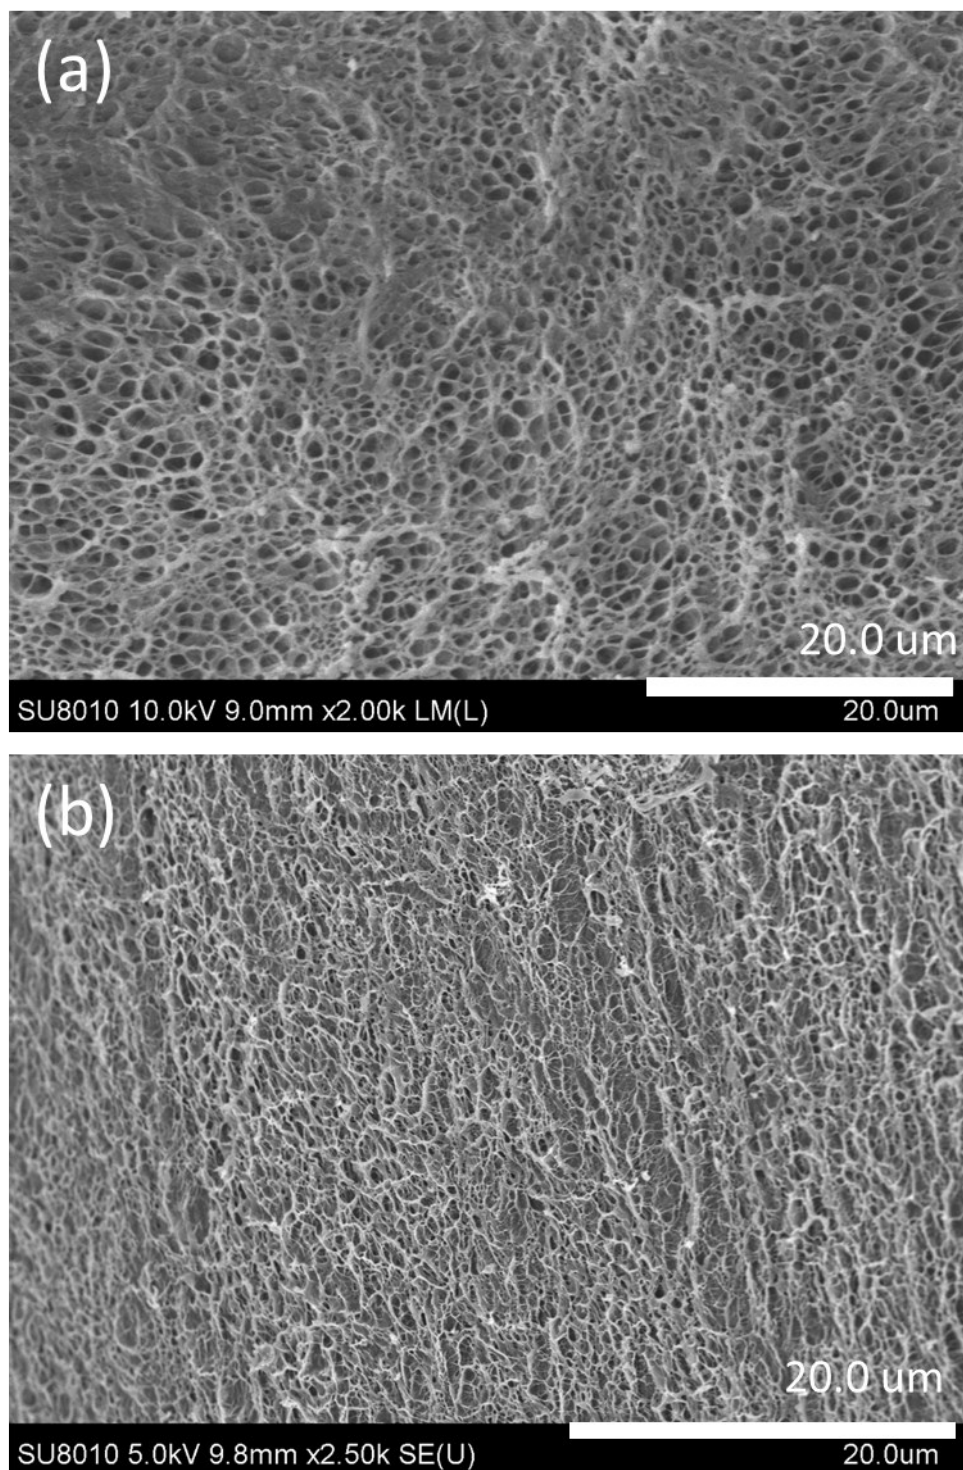

**Figure S1.** SEM micrographs of the N<sub>3</sub>-PVA hydrogel.

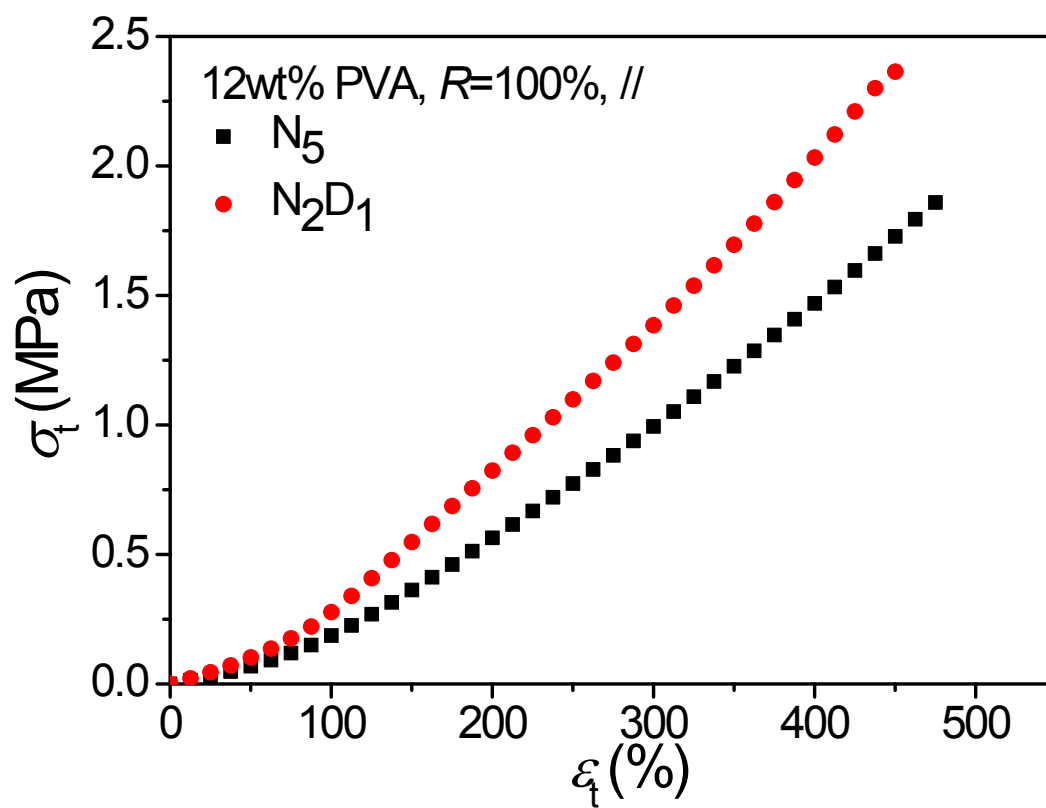

**Figure S2.** The typical tensile stress–strain ( $\sigma_t$ – $\epsilon_t$ ) curves of  $N_5$ -PVA and  $N_2D_1$ -PVA (//) hydrogels.

**Table S1.** The original, elongated and retracted lengths of the N<sub>2</sub>D<sub>1</sub>-PVA hydrogel samples with different

*R*.

| <i>R</i>              | 50% | 100% | 150% | 200% |
|-----------------------|-----|------|------|------|
| <i>L</i> <sub>0</sub> | 6   | 6    | 6    | 6    |
| <i>L</i>              | 9   | 12   | 15   | 18   |
| <i>L</i> '            | 7.5 | 8.9  | 10   | 11.5 |
| <i>R</i> '            | 25% | 48%  | 67%  | 92%  |

*R*: Drawing ratio; *L*<sub>0</sub>: initial length; *L*: elongated length; *L*': retracted length; *R*' = (*L*' - *L*<sub>0</sub>) / *L*<sub>0</sub>.

## Supporting Video

**Video S1.** The video shows the difference in field of view between N<sub>3</sub>-PVA hydrogel and N<sub>2</sub>D<sub>1</sub>-PVA

(//) hydrogel under the POM with rotating the stage.
